# Supplementary material for: Stable diarylnitroxide diradical with triplet ground state
Source: Royal Society of Chemistry journal article supplement (doi:10.1039/b909741d), 2009-01-01
Supplement: b909741d.pdf [file b909741d.pdf]

# Electronic Supplementary Information

## Stable Diarylnitroxide Diradical with Triplet Ground State

*Andrzej Rajca\**, *Kouichi Shiraishi*, *Suchada Rajca*

Department of Chemistry, University of Nebraska, Lincoln, NE 68588-0304.

E-mail address: [arajca1@unl.edu](mailto:arajca1@unl.edu)

## Table of Contents

1. Complete reference 16.
2. General procedures and materials.
3. EPR spectroscopy (Table S1).
4. SQUID magnetometry.
5. Oxidation of diamine **3** with DMDO: nitroxide diradical **2**.
6. Oxidation of diamine **3** with *m*-CPBA: characterization of nitroxide diradical **2** (Table S2).
7. Reduction of nitroxide radicals to the corresponding amines.
8. Supporting figures.
  - (a) EPR spectra for oxidation of diamine **3** with DMDO (Figure S1).
  - (b) EPR, SQUID, <sup>1</sup>H NMR, and UV-vis characterization of nitroxide diradical **2** (Figures S2–S12).
9. DFT calculations (Table S3).
10. Supporting references.

## 1. Complete reference 16.

16. M. J. Frisch, G. W. Trucks, H. B. Schlegel, G. E. Scuseria, M. A. Robb, J. R. Cheeseman, J. A. Montgomery Jr., T. Vreven, K. N. Kudin, J. C. Burant, J. M. Millam, S. S. Iyengar, J. Tomasi, V. Barone, B. Mennucci, M. Cossi, G. Scalmani, N. Rega, G. A. Petersson, H. Nakatsuji, M. Hada, M. Ehara, K. Toyota, R. Fukuda, J. Hasegawa, M. Ishida, T. Nakajima, Y. Honda, O. Kitao, H. Nakai, M. Klene, X. Li, J. E. Knox, H. P. Hratchian, J. B. Cross, C. Adamo, J. Jaramillo, R. Gomperts, R. E. Stratmann, O. Yazyev, A. J. Austin, R. Cammi, C. Pomelli, J. W. Ochterski, P. Y. Ayala, K. Morokuma, G. A. Voth, P. Salvador, J. J. Dannenberg, V. G. Zakrzewski, S. Dapprich, A. D. Daniels, M. C. Strain, O. Farkas, D. K. Malick, A. D. Rabuck, K. Raghavachari, J. B. Foresman, J. V. Ortiz, Q. Cui, A. G. Baboul, S. Clifford, J. Cioslowski, B. B. Stefanov, G. Liu, A. Liashenko, P. Piskorz, I. Komaromi, R. L. Martin, D. J. Fox, T. Keith, M. A. Al-Laham, C. Y. Peng, A. Nanayakkara, M. Challacombe, P. M. W. Gill, B. Johnson, W. Chen, M. W. Wong, C. Gonzalez and J. A. Pople, *Gaussian 03*, Revision E.01 (Gaussian, Wallingford, CT, 2004).

## 2. General procedures and materials.

Per-deuterated solvents for NMR spectroscopy were obtained from Cambridge Isotope Laboratories. All other commercially available chemicals were obtained from Aldrich, unless indicated otherwise.

Solution of DMDO in acetone (ca. 0.05–0.10 M) was prepared as described previously.<sup>S1</sup> Extraction and concentration into a solution in dichloromethane/acetone (~6:1, ca. 0.35–0.1 M) was carried out as reported in the literature.<sup>S2</sup> Concentrations of DMDO were periodically determined by titrations carried out in duplicate with triphenylphosphine; molar ratio of unreacted phosphine to the corresponding oxide was determined by <sup>1</sup>H NMR spectroscopy.<sup>S3</sup>

Column chromatography was carried out on TLC grade silica gel (Aldrich), using 0–20 psig pressure. Preparative TLC (PTLC) was carried out using Analtech silica plates (tapered with a preadsorbent zone). For selected separations, silica gel was deactivated by treatment with a solution of triethylamine in pentane. Standard techniques for synthesis under inert atmosphere, using Schlenk glassware and gloveboxes (Mbraun and Vacuum Atmospheres), were employed. NMR spectra were obtained using Bruker spectrometer ( $^1\text{H}$ , 400 MHz) using acetone- $d_6$  and chloroform- $d$  ( $\text{CDCl}_3$ ) as solvent. The 500 MHz instrument was equipped with a cryoprobe. The  $^1\text{H}$  chemical shift references were as follows: acetone- $d_5$ , 2.05 ppm and  $\text{CDCl}_3$ , 7.26 ppm. IR spectra were obtained using a Nicolet Avatar 360 FT-IR instrument, equipped with an ATR sampling accessory (Spectra Tech, Inc.). A few drops of the compound in  $\text{CH}_2\text{Cl}_2$  were applied to the surface of a ZnSe ATR plate horizontal parallelogram ( $45^\circ$ , Wilmad). After the solvent evaporated, the spectrum was acquired ( $4\text{-cm}^{-1}$  resolution).

UV-vis spectra were obtained on Shimadzu (UV-2401PC) spectrophotometer. Only one concentration was used; thus, the values of  $\varepsilon_{\text{max}}$  were very approximate.

**Purification, drying, and titration of *m*-CPBA.** *m*-CPBA was dissolved in benzene and washed with buffer solution (pH = 7.4,  $\text{NaH}_2\text{PO}_4/\text{NaOH}$ ). The organic layer was dried over  $\text{MgSO}_4$  (or  $\text{Na}_2\text{SO}_4$ ), filtered, and solvent removed. White needle crystals were obtained by recrystallization from dichloromethane at  $0^\circ\text{C}$ . The *m*-CPBA was then dried under 1 mTorr vacuum with molecular sieves ( $3\text{ \AA}$ ) overnight. (Molecular sieves were pre-activated at  $200\text{--}210^\circ\text{C}$  under 1 mTorr vacuum overnight). Titration of *m*-CPBA was performed using the following procedure. *m*-CPBA was dissolved in  $\text{CH}_3\text{COOH}$  (minimum volume) and then transferred to a  $\text{H}_2\text{O}/\text{CH}_3\text{COOH}$  solution ( $\text{N}_2$  bubbling for 5 min before transfer) under  $\text{N}_2$  flow. An aqueous

solution of KI (excess) was added to the *m*-CPBA solution (obtained orange solution) and heated to reflux for 15 min. The solution was then cooled to ambient temperature and titrated with an aqueous solution of Na<sub>2</sub>S<sub>2</sub>O<sub>3</sub>.

### 3. EPR spectroscopy.

CW X-band EPR spectra for diarylnitroxide diradical **2** were acquired on Bruker EMX instrument, equipped with a frequency counter. Temperature was controlled with either nitrogen flow system (130–300 K) or liquid nitrogen dewar insert (~80 K). The samples were contained in either 4-mm EPR quartz tubes or 5-mm SQUID sample tubes. All spectra were obtained with the oscillating magnetic field perpendicular (TE<sub>102</sub>) to the swept magnetic field. The *g*-values were referenced using DPPH (*g* = 2.0037, powder, Aldrich).

The WINEPR SimFonia program (Version 1.25, Bruker) was used for spectral simulations of nitroxide diradical **2** in rigid matrices (Table S1).

**Table S1.** EPR spectral parameters for diarylnitroxide diradical **2** and planar alkylarylnitroxide diradical.

| diradical                                                                           | solvent | <i>T</i> (K)     | $\nu^a$<br>(GHz) | $g_x$  | $g_y$  | $g_z$  | $ D/hc /10^{-4}$<br>(cm <sup>-1</sup> ) | $ E/hc /10^{-4}$<br>(cm <sup>-1</sup> ) | $ A_{yy}/2hc /10^{-4}$<br>( <sup>14</sup> N, cm <sup>-1</sup> ) |
|-------------------------------------------------------------------------------------|---------|------------------|------------------|--------|--------|--------|-----------------------------------------|-----------------------------------------|-----------------------------------------------------------------|
| <b>2</b>                                                                            | toluene | ~80 <sup>b</sup> | 9.4246           | 2.0074 | 2.0016 | 2.0045 | 122.3                                   | 14.4                                    | 10.6                                                            |
|                                                                                     |         | 140 <sup>c</sup> | 9.6545           | 2.0076 | 2.0020 | 2.0047 | 122.5                                   | 14.0                                    | 10.6                                                            |
| 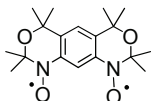 | 2-MeTHF | 140 <sup>d</sup> | 9.6504           | 2.0084 | 2.0024 | 2.0052 | 130                                     | 15.5                                    | 11.5                                                            |

<sup>a</sup> Microwave frequencies ( $\nu$ ) are dependent on the cavity type and the sample. <sup>b</sup> Sample label: KS373-3; simulation label: KS373sm5. <sup>c</sup> Sample label: KS718-1-recryst1; simulation label: smKS750. <sup>d</sup> ref S4.

#### 4. SQUID magnetometry.

5-Tesla AC/DC SQUID magnetometer, with continuous temperature control and operating in the DC-mode, was used. All solution samples and some solid samples were contained in home-made 5-mm O.D. EPR quality quartz tubes, modified to possess a thin bottom, which is 6 cm from the end of the tube (referred to as “SQUID tubes”).<sup>S4,S5</sup>

For solid state samples, diradical **2** (5.13 mg or 12.32 mg) was loaded to the 3-piece gelatine capsule. Following the measurements, the capsule was emptied (for the larger sample, 2.20 mg was retained), and then identical sequences of measurements was carried out for the point-by-point correction for diamagnetism. Additional correction was based upon Pascal constants:  $\chi_{\text{dia}} = -3.27 \times 10^{-4} \text{ emu mol}^{-1}$ . Other samples (0.66–6.14 mg) were measured using similar procedure but without point-by-point correction.

For another set of solid state samples, diradical **2** was loaded to the SQUID tube, placed under vacuum, and then flame sealed under partial pressure of helium gas. Following the measurements, the SQUID sample tube was opened and cleaned, and then identical sequences of measurements were carried out for the point-by-point correction for diamagnetism; additional corrections were based upon Pascal constants.

For solution samples, diradical **2** (0.53 mg for the THF sample in Figure 4, text) was loaded into the SQUID tube, and then placed under vacuum. THF or dichloromethane were vacuum transferred, and after the tube was flame sealed under vacuum, the samples were carefully inserted to the magnetometer, as described elsewhere.<sup>S4</sup> Correction for diamagnetism was implemented by extrapolation of the  $\chi$  vs.  $1/T$  plots in the 70–140 K temperature range ( $R^2 = 0.9999$ ).

Numerical curve fitting for magnetic data was carried out with the SigmaPlot for Windows software package. The reliability of a fit is measured by the parameter dependence, which is defined as follows:  $dependence = 1 - ((variance\ of\ the\ parameter,\ other\ parameters\ constant)/(variance\ of\ the\ parameter,\ other\ parameters\ changing))$ . Values close to 1 indicate overparametrized fit.

$M$  vs.  $H$  data in THF at low temperatures ( $T = 1.8, 3, 5$  K) were analyzed with Brillouin functions (with mean-field parameter,  $\theta$ ). For the THF sample in Figure 4 (text), numerical fits gave  $S = 0.99$  (i.e.,  $S = 1.0$ ),  $\theta = -0.15$  K, with the parameter dependence of 0.56, 0.84, 0.97 at 1.8, 3, and 5 K, respectively.

## 5. Oxidation of diamine **3** with DMDO.

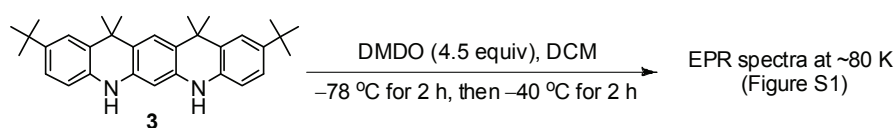

**Low-temperature oxidation of diamine **3** with EPR monitoring.** Dichloromethane (~0.2 mL) was added by vacuum transfer to diamine **3** (1.47 mg, 1 equiv) in a 4-mm O.D. EPR quartz sample tube equipped with high-vacuum stopcock. Subsequently, DMDO (~0.10 M solution in dichloromethane, ~0.14 mL, ~4.5 equiv) was vacuum transferred. After stirring for 2 h at -78 °C, EPR spectrum for the dark reaction mixture were obtained at ~80 K, as illustrated in Figure S1 (KS281-1). After recording the EPR spectrum, the sample tube was kept for 2 h at -40 °C, and then for the red homogenous reaction mixture, another set EPR spectra was obtained at ~80 K as illustrated in Figure S1 (KS281-4).

## 6. Oxidation of diamine **3** with *m*-CPBA: characterization of nitroxide diradical **2**.

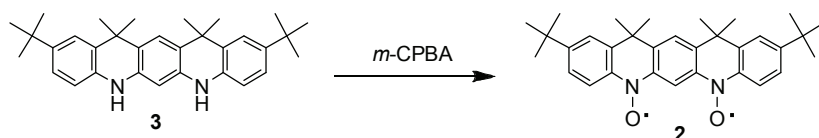

**Table S2.** Characterization of nitroxide diradical **2**.

| <i>Sample label for nitroxide diradical 2</i> | <i>EPR Label (Figure)</i>                                                    | <i>SQUID Label (Figure)</i>     | <i>SQUID Description</i>                                     | <i><sup>1</sup>H NMR Label (Figure)</i>               |
|-----------------------------------------------|------------------------------------------------------------------------------|---------------------------------|--------------------------------------------------------------|-------------------------------------------------------|
| KS357-3                                       | KS373* <sup>1</sup><br>(Fig. 3, text)                                        | -                               | -                                                            | KS357-3<br>(Fig. S10, ESI)                            |
| KS410-4                                       | KS419/KS410<br>(Fig. S6, ESI)<br>KS424r1r2r3* <sup>2</sup><br>(Fig. S7, ESI) | KS424r2H<br>(Fig. 4, text)      | Solution in THF                                              | KS410-4<br>(Fig. S11, ESI)                            |
| KS436-1                                       | KS443/KS436-1<br><br>KS447/KS436-1* <sup>3</sup>                             | KS443<br><br>KS446<br><br>KS447 | Solid/capsule<br><br>Solution in DCM<br><br>Solid/SQUID tube | KS436-1<br>(Fig. S11, ESI)<br><br>KS447* <sup>3</sup> |
| KS450-1* <sup>4</sup>                         | KS450-1-1<br>(Fig. S5, ESI)                                                  | KS451r1G<br>(Fig. 5, text)      | Solid/capsule,<br>(point-by-point)                           | -                                                     |
| KS718-1-recryst1                              | KS750r1/r2* <sup>1</sup><br>(Fig. S4, ESI)                                   | KS754r1G<br>(Fig. S8, ESI)      | Solid/capsule                                                | -                                                     |
| KS744-1-recryst1                              | KS764* <sup>1</sup><br>(Fig. S9, ESI)                                        | KS767                           | Solid/capsule                                                | -                                                     |
| KS1054-2                                      | KS1058<br>KS1054-2r5r6<br>(Fig. S2, ESI)                                     | KS1066                          | Solid/SQUID tube<br>no background                            | -                                                     |
| KS1116-2                                      | KS1117<br>KS1142r1/r2<br>(Fig. S2, ESI)                                      | KS1139rF<br>(Fig. S3, ESI)      | Solid/capsule,<br>(point-by-point)                           | -                                                     |

\*<sup>1</sup> EPR tube was flame-sealed. \*<sup>2</sup> EPR spectra taken directly in the SQUID tube. \*<sup>3</sup> EPR and <sup>1</sup>H NMR spectra after SQUID studies. \*<sup>4</sup>

UV/vis (*n*-heptane):  $\lambda_{\max}/\text{nm}$  ( $\epsilon_{\max}/\text{L mol}^{-1} \text{cm}^{-1}$ ) = 285 ( $\sim 5.1 \times 10^3$ ), 311 ( $\sim 1.1 \times 10^4$ ), 330 ( $\sim 1.3 \times 10^4$ ), 418 ( $\sim 1 \times 10^3$ ), 442 ( $\sim 1.0 \times 10^3$ ), 474 ( $\sim 8 \times 10^2$ ) (Fig. S12, ESI, label: KS450-1\_r1).



**Nitroxide diradical 2: general procedure with partial purification (KS1116).** *m*-CPBA (3.4 mL of 0.39 M solution in dichloromethane, 2 equiv) was slowly added to diamine **3** (KS911-1, MW = 452.6, 300.0 mg, 0.663 mmol) in DCM (44 mL, 0.015 M) at 0 °C under nitrogen atmosphere. After 20 min at 0 °C, the second portion of *m*-CPBA (3.4 mL of 0.39 M solution in dichloromethane, 2 equiv) was slowly added to the resultant pink-brown homogenous reaction mixture. After 40 min at 0 °C, the third portion of *m*-CPBA (3.4 mL of 0.39 M solution in dichloromethane, 2 equiv) was added, and then the reaction mixture was stirred for 2.5 h at 0 °C. The obtained dark yellow solution was concentrated to provide crude product (KS1116-crude, 929.0 mg). Rapid filtration through silica gel column (deactivated silica, dichloromethane/ether, 9:1) gave orange fraction containing nitroxide diradical. The orange fraction was concentrated, to provide nitroxide diradical as green powder (79.3 mg, 25%, label: KS1116-2). In another reaction (label: KS1054) on the 200-mg scale, 48.7 mg (23%, label: KS1054-2) of nitroxide diradical was obtained from diamine **3** (200.0 mg, 0.442 mmol).

**Nitroxide diradical 2: two representative procedures with complete purifications (KS357 and KS410).** The crude reaction mixture (KS357), obtained from diamine **3** (39.4 mg) using the general procedure, was purified by two consecutive PTLC (dichloromethane/ether, 98:2). The orange fraction was collected, and then by recrystallized from dichloromethane/methanol at -20 °C, to provide diradical **2** as green solid: 2.4 mg (6%) (label: KS357-3).

The crude reaction mixture (KS-410), obtained from diamine **3** (97.3 mg) using the general procedure (vacuum transferred dichloromethane, 19.5 mL), was filtered through silica plug at room temperature (eluent: benzene/ether, 95:5,  $R_f = 0.4$ ). Subsequently, two consecutive PTLC were carried out. Orange fraction (slightly higher  $R_f$ -value than the adjacent “green fraction”) was

collected. After the first PTLC (benzene/ether, 98:2), diradical **2** with a small admixture of monoradical (7.3 mg, label: KS410-2) was obtained. After the second PTLC (dichloromethane/ether, 98:2), diradical **2** was obtained as green solid: 4.8 mg (5%, label: KS410-4) (EPR spectra: Figure S6).

## 7. Reduction of nitroxide radicals to the corresponding amines.

### Reduction of 4,4'-di-*tert*-butyl-diphenylnitroxide radical (KS842).

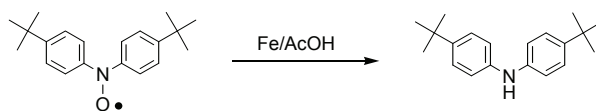

Acetic acid (EMD, 50  $\mu$ l) and Fe (Acros, MW = 55.8, 0.8 mg, 0.0143 mmol) was added to 4,4'-di-*tert*-butyl-diphenylnitroxide radical<sup>S3</sup> (0.81 mg, 2.73  $\mu$ mol); the resultant orange solution was stirred for 10 min at 50  $^{\circ}$ C, and then for 3 h at room temperature. The reaction mixture was added to saturated aqueous  $K_2CO_3$ , extracted with dichloromethane, and dried over  $Na_2SO_4$ . Removal of solvents gave crude reaction mixture (~1.2 mg, label: KS842-crude), for which  $^1H$  NMR spectrum was obtained:  $^1H$  NMR (400 MHz,  $CDCl_3$ ):  $\delta$  = 7.274 (d,  $J$  = 8.8 Hz, 4H), 7.003 (d,  $J$  = 8.4 Hz, 4H), 5.574 (brs, 1H), 1.307 (s, 18H).  $^1H$  NMR spectrum for independently prepared reference sample of 4,4'-di-*tert*-butylphenylamine (label: KS187-cryst1):  $^1H$  NMR (400 MHz,  $CDCl_3$ ):  $\delta$  = 7.279 (d,  $J$  = 8.4 Hz, 4H), 7.006 (d,  $J$  = 8.4 Hz, 4H), 5.571 (brs, 1H), 1.313 (s, 18H).

### Reduction of nitroxide diradical **2** to diamine **3** (KS844).

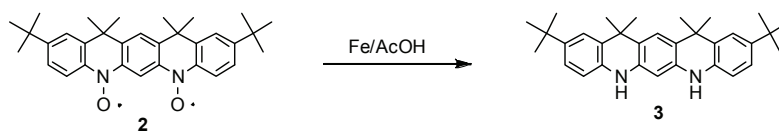

Acetic acid (EMD, 200  $\mu$ l) and Fe (Acros, MW = 55.8, 0.8 mg, 0.0143 mmol) was added to nitroxide diradical **2** (0.54 mg, 1.1  $\mu$ mol, KS450-1); characterization of this sample of diradical is

summarized in Table S2. The resultant orange solution was stirred for 10 min at 50 °C, and then for 3 h at room temperature. Subsequently, the reaction mixture was added to saturated aqueous K<sub>2</sub>CO<sub>3</sub>, extracted with dichloromethane, and dried over Na<sub>2</sub>SO<sub>4</sub>. Removal of solvents gave crude reaction mixture (~0.6 mg, label: KS844-crude); the <sup>1</sup>H NMR spectrum showed the diamine **3** with a small admixture of impurities. <sup>1</sup>H NMR (400 MHz, acetone-*d*<sub>6</sub>): diamine **3**, δ = 7.760 (s, 2H of NH), 7.429 (d, *J* = 2.4 Hz, 2H), 7.404 (s, 1H), 7.013 (dd, *J* = 2.0, 8.4 Hz, 2H), 6.680 (d, *J* = 8.4 Hz, 2H), 6.224 (s, 1H), 1.574 (s, 12H), 1.292 (s, 18H); impurities (aromatic region), 8.59 (d, 0.05H), 7.90 (s, 0.03H), 7.10 (d, 0.14H), 7.55 (m, 0.38H), 7.43 (m, 0.12H), 7.25 (dd, 0.09H), 7.18 (d, 0.09H), 6.96 (dd, 0.30H), 6.57 (d, 0.08H). Purification by PTLC (benzene/pentane, 8:2), gave diamine **3** as white powder (0.43 mg, 80%) (label: KS844-1). <sup>1</sup>H NMR (400 MHz, acetone-*d*<sub>6</sub>): δ = 7.765 (s, 2H of NH), 7.429 (d, *J* = 2.4 Hz, 2H), 7.404 (s, 1H), 7.013 (dd, *J* = 2.0, 8.4 Hz, 2H), 6.681 (d, *J* = 8.4 Hz, 2H), 6.224 (s, 1H), 1.573 (s, 12H), 1.291 (s, 18H).

## 8. Supporting figures.

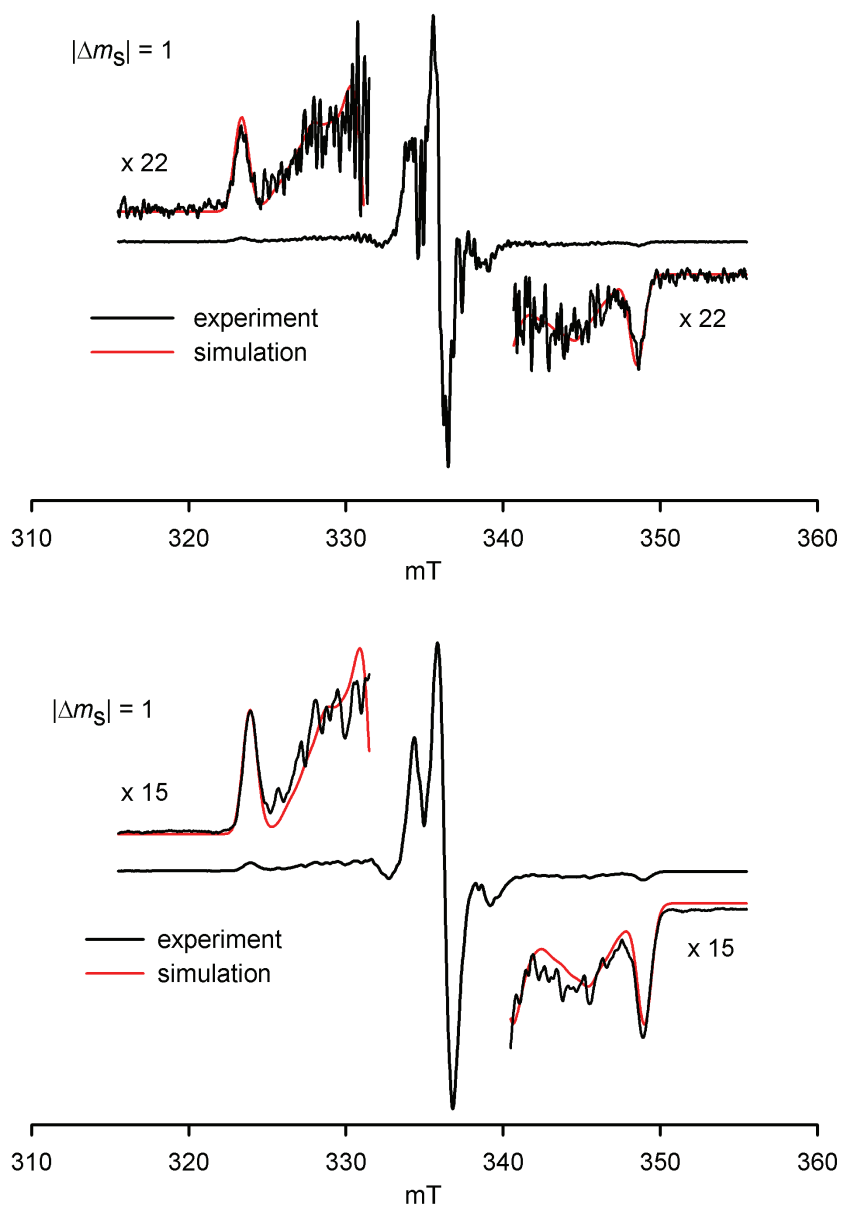

**Figure S1.** EPR spectra (X-band, 77 K) for reaction mixtures for low-temperature oxidation of diamine **3** with DMDO. Top plot: spectrum taken after 2 h at  $-78\text{ }^{\circ}\text{C}$ ,  $\nu = 9.4183\text{ GHz}$  (label: KS281-1). Bottom plot: spectrum taken after additional 2 h at  $-40\text{ }^{\circ}\text{C}$ ,  $\nu \approx 9.42\text{ GHz}$  (label: KS281-4). The side bands were simulated with the following parameters for the  $S = 1$  state:  $|D/hc| = 11.75 \times 10^{-3}\text{ cm}^{-1}$ ,  $|E/hc| = 1.3 \times 10^{-3}\text{ cm}^{-1}$ ,  $|A_{yy}/2hc| = 10.0 \times 10^{-4}\text{ cm}^{-1}$ ,  $g_x \approx 2.0076$ ,  $g_y = 2.0020$ ,  $g_z = 2.0040$ , Gaussian line ( $L_x = 1.1$ ,  $L_y = 1.1$ ,  $L_z = 0.9\text{ mT}$ ) (label: SMdmdo4).

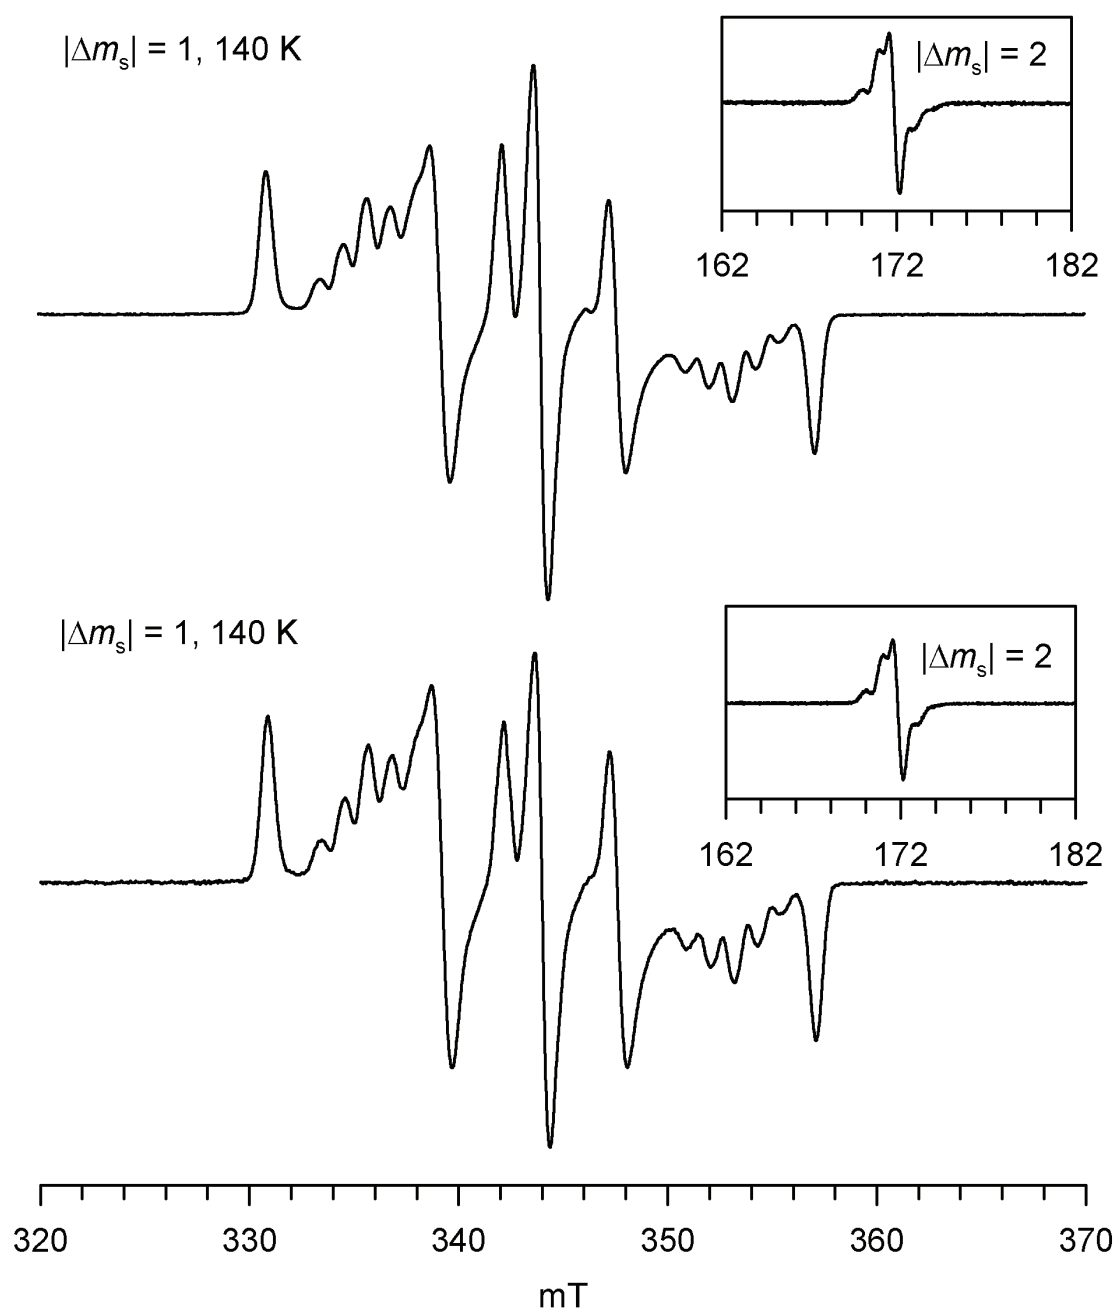

**Figure S2.** EPR (X-Band,  $\nu = 9.652$  and  $9.651$  GHz) spectra for nitroxide diradical **2** in toluene at 140 K, obtained in  $\sim 20\%$  isolated yields from two large-scale reactions. Top spectra (labels: KS1054-2r5/r6) are for the sample KS1054-2 (47.4 mg isolated from the reaction starting with 200 mg of diamine **3**). The bottom spectra (labels: KS1142r1/r2) are for the sample KS1116-2 (79.3 mg isolated from the reaction starting with 300 mg of diamine **3**); the bottom spectra were recorded after SQUID magnetometry (Figure S3).

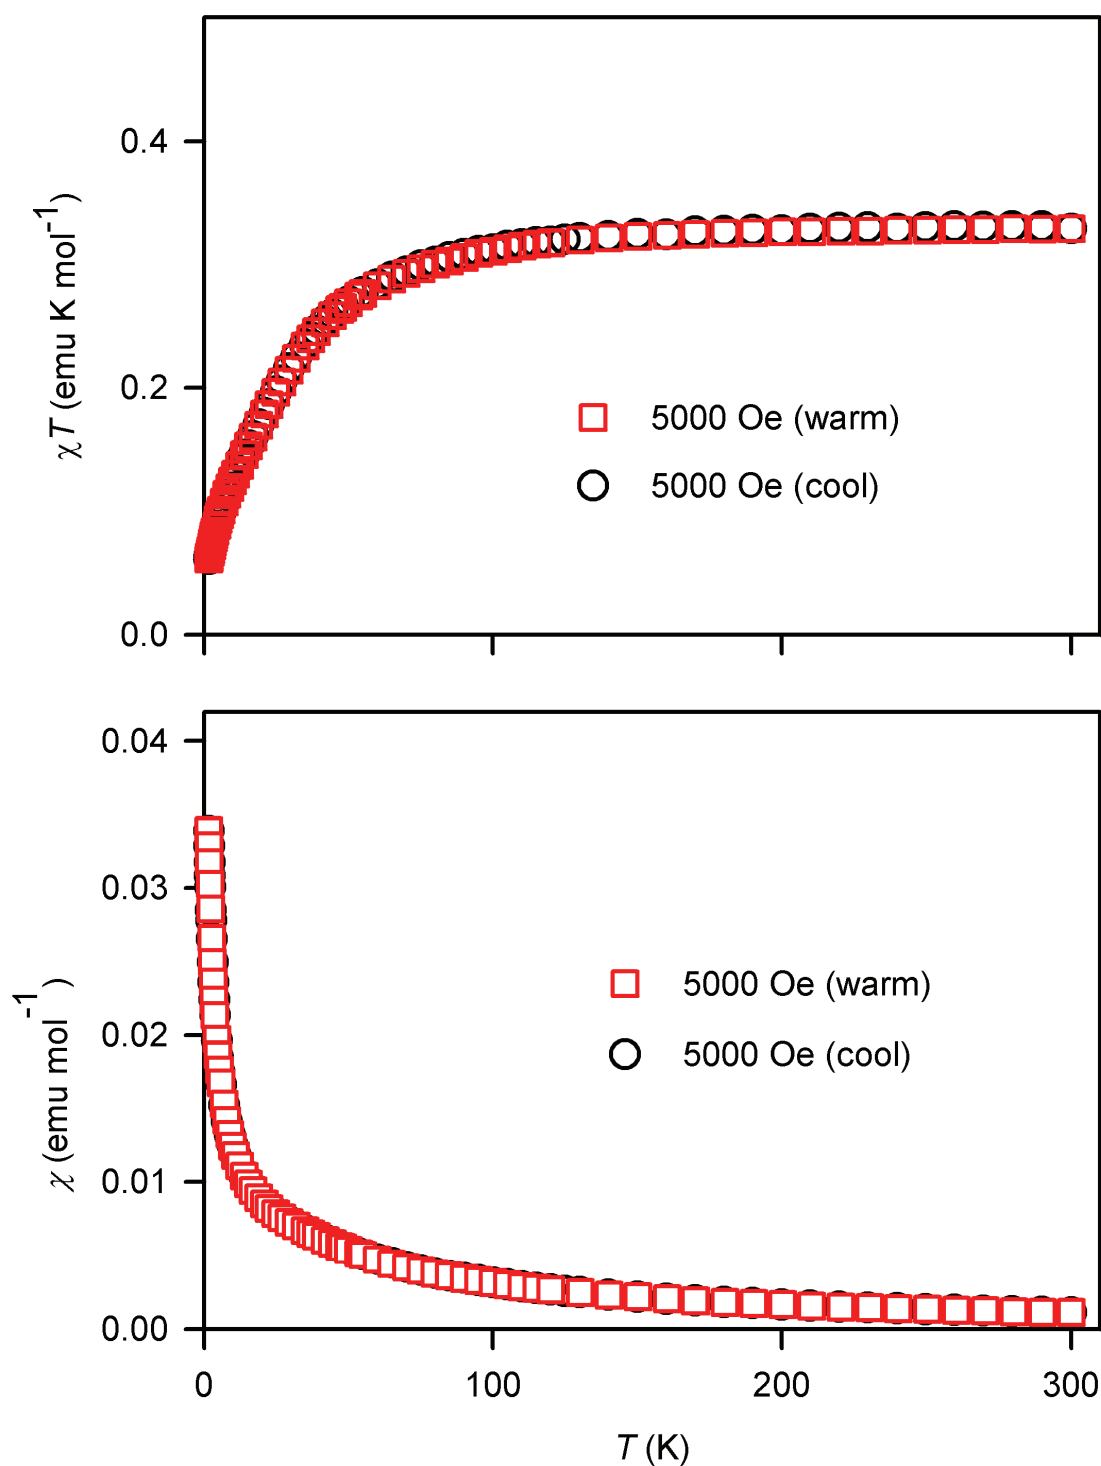

**Figure S3.** SQUID magnetometry for solid nitroxide diradical **2**: plot of  $\chi T$  vs.  $T$ ,  $\chi T = 0.33 \text{ emu K mol}^{-1}$  at 200–300 K, with the point-by-point background correction and Pascal constant correction (SQUID label: KS1139rF). This sample of **2** is from the large-scale preparation (label: KS1116-2); EPR spectra for this sample are shown in Figure S2 (preceding page).

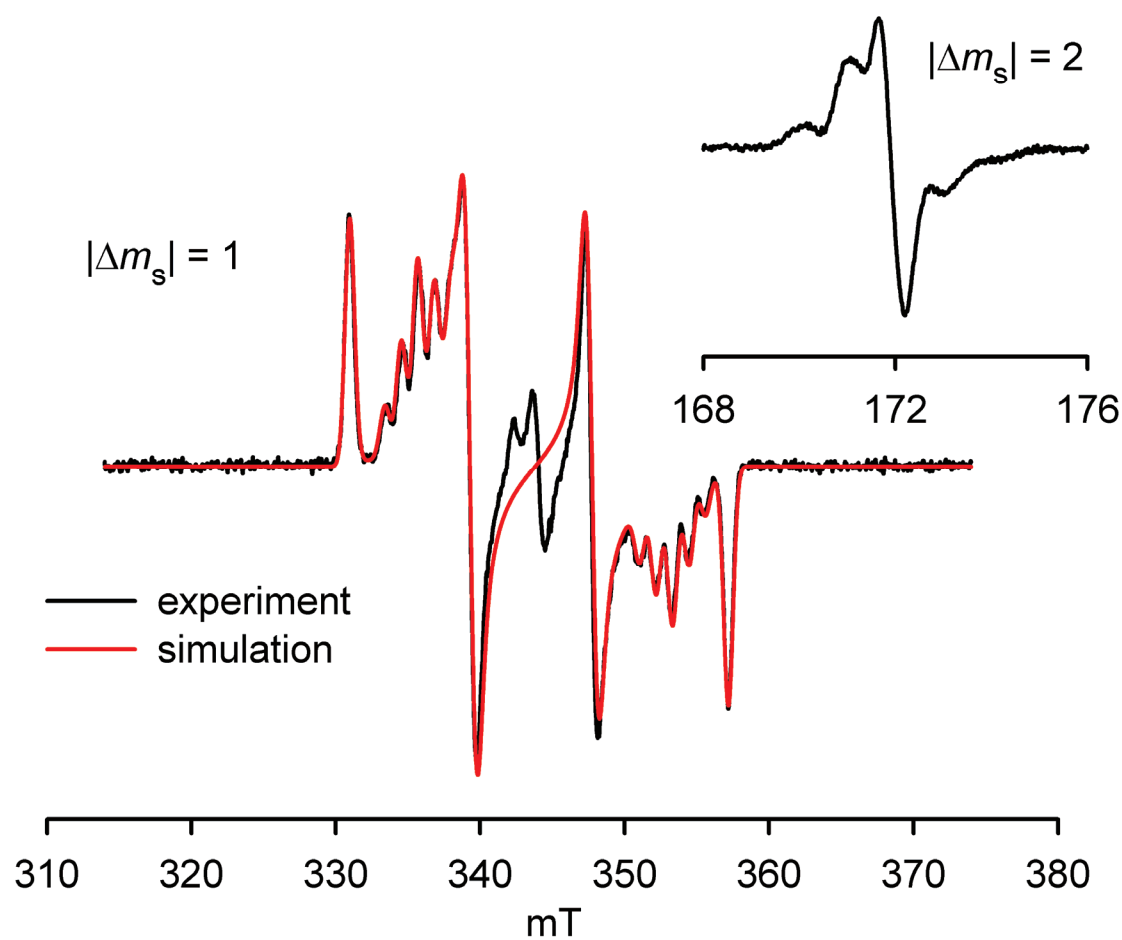

**Figure S4.** EPR (X-Band,  $\nu = 9.6545$  GHz) spectrum of nitroxide diradical **2** (sample label: KS0718-1-recryst1) in toluene at 140 K (KS750r1/r2, smKS750). This is the identical sample (KS0718-1-recryst1) as used for magnetic data (KS754G1) in Figure S8. The spectral simulation of the  $|\Delta m_s| = 1$  region is shown as red trace. The fitting parameters for the spectral simulation to the  $S = 1$  state are:  $|D/hc| = 1.225 \times 10^{-2} \text{ cm}^{-1}$ ,  $|E/hc| = 1.40 \times 10^{-3} \text{ cm}^{-1}$ ,  $|A_{yy}/2hc| = 1.06 \times 10^{-3} \text{ cm}^{-1}$ ,  $g_x = 2.0076$ ,  $g_y = 2.0020$ ,  $g_z = 2.0047$ , Gaussian line ( $L_x = 0.75$  mT,  $L_y = 0.70$  mT,  $L_z = 0.65$  mT). The center lines correspond to an  $S = \frac{1}{2}$  (monoradical) impurity.

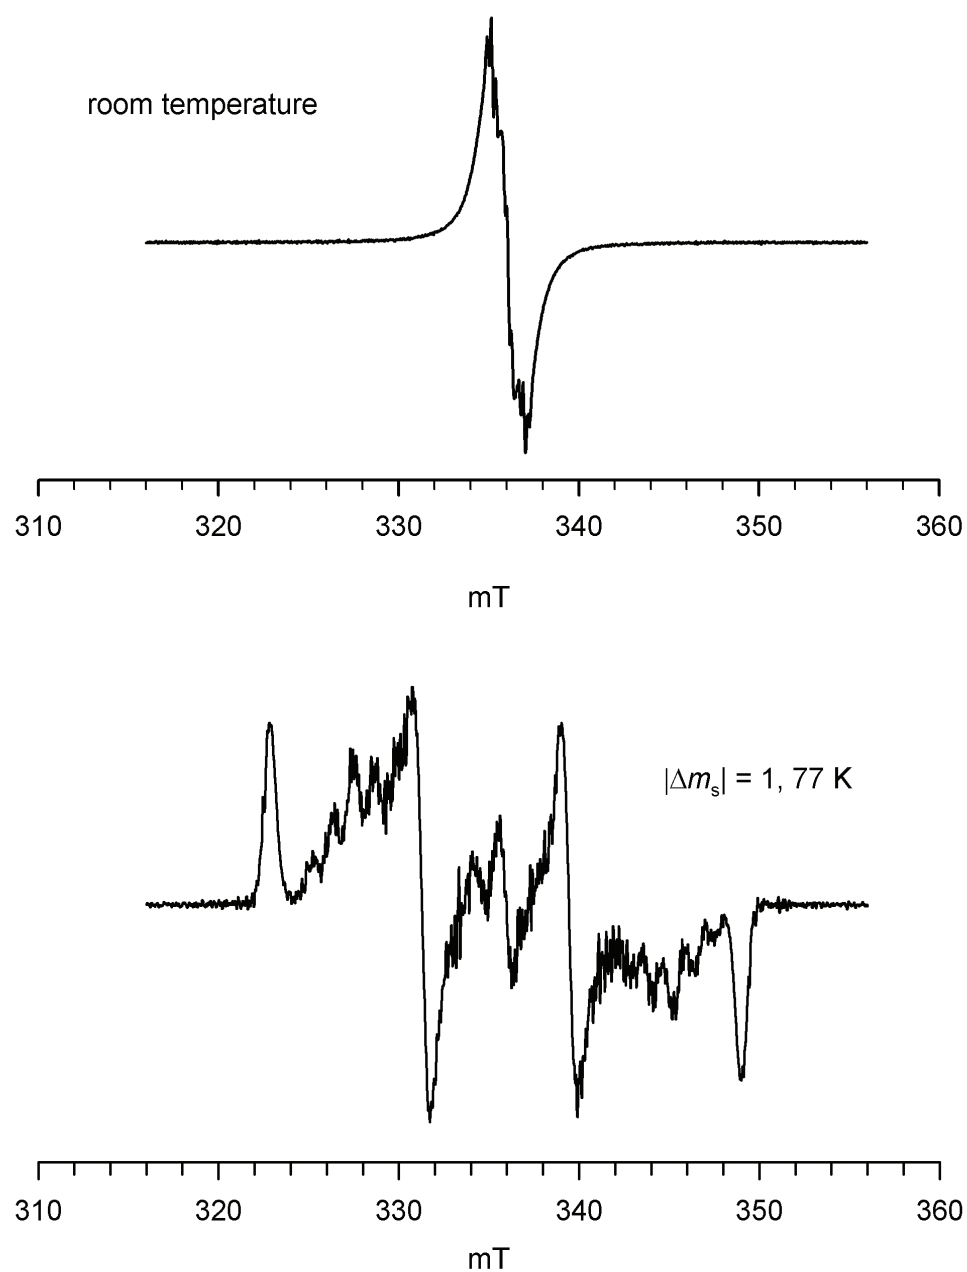

**Figure S5.** EPR (X-Band) spectra for nitroxide diradical **2** in toluene (sample label: KS450-1). The top spectrum ( $\nu = 9.4299 \text{ GHz}$ ,  $0.204 \text{ mW}$ , modulation amplitude of  $0.5 \text{ Gauss}$ ) is obtained at room temperature (KS450-1-1). The bottom spectrum ( $\nu = 9.4241 \text{ GHz}$ ,  $0.0204 \text{ mW}$ , modulation amplitude of  $2.0 \text{ G}$ ) is obtained at  $77 \text{ K}$  (KS450-1-3). This is the identical sample (KS450-1) as used for magnetic data in the solid state (KS451r1G) in Figure 5, main text.



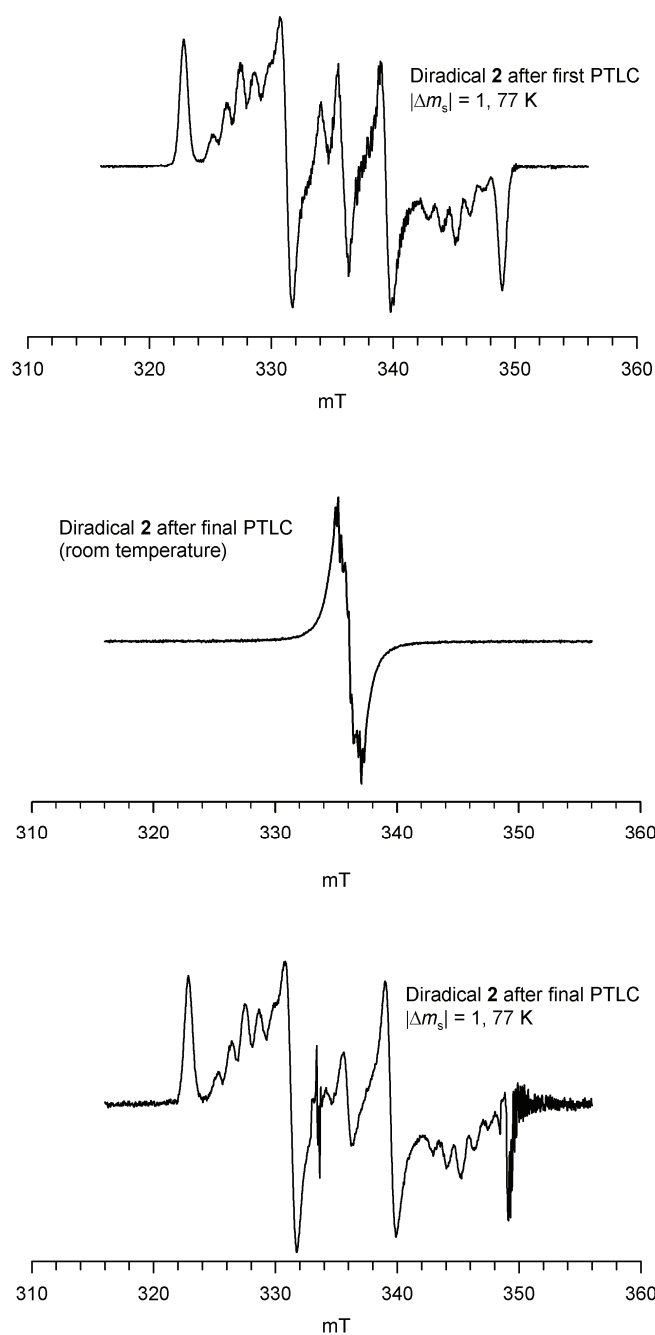

**Figure S6.** EPR (X-Band) spectra for nitroxide diradical **2** in toluene. The top spectrum (sample label: KS410-2,  $\nu = 9.4227 \text{ GHz}$ ,  $0.0204 \text{ mW}$ , modulation amplitude of  $2.0 \text{ G}$ ), the middle spectrum (sample label: KS410-4,  $\nu = 9.4306 \text{ GHz}$ ,  $0.204 \text{ mW}$ , modulation amplitude of  $0.5 \text{ G}$ ), and the bottom spectrum ( $\nu = 9.4244 \text{ GHz}$ ,  $0.0204 \text{ mW}$ , modulation amplitude of  $2.0 \text{ G}$ ) are obtained at  $77 \text{ K}$ , room temperature, and  $77 \text{ K}$ , respectively. The sample KS410-4 is identical to that used for magnetic data in THF (KS424r2H) in Figure 4, main text.

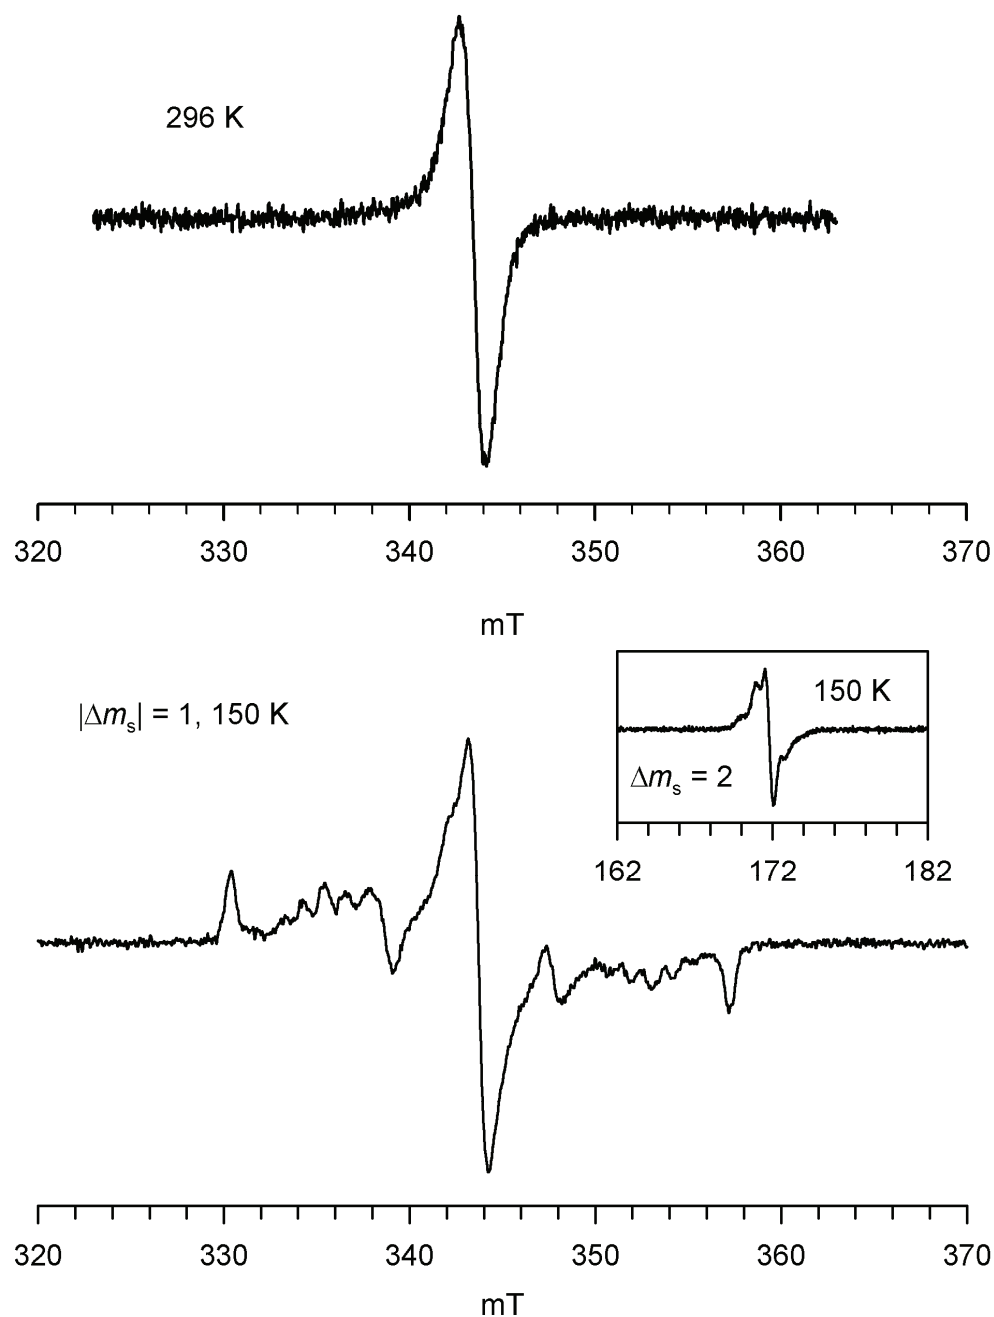

**Figure S7.** EPR (X-Band) spectra for ~15 mM nitroxide diradical **2** (sample label: KS410-4) in THF, which contained in the flame-sealed SQUID tube, following magnetic data in THF (KS424r2H). The magnetic data are shown in Figure 4 (main text). The top spectrum ( $\nu = 9.6415$  GHz, 0.00204 mW, modulation amplitude of 0.5 Gauss) is obtained at 296 K (KS424r1). The bottom spectra (for  $|\Delta m_s| = 1$ ,  $\nu = 9.6468$  GHz, 0.00204 mW, modulation amplitude of 0.5 Gauss) is obtained at 150 K (KS424r2/r3).

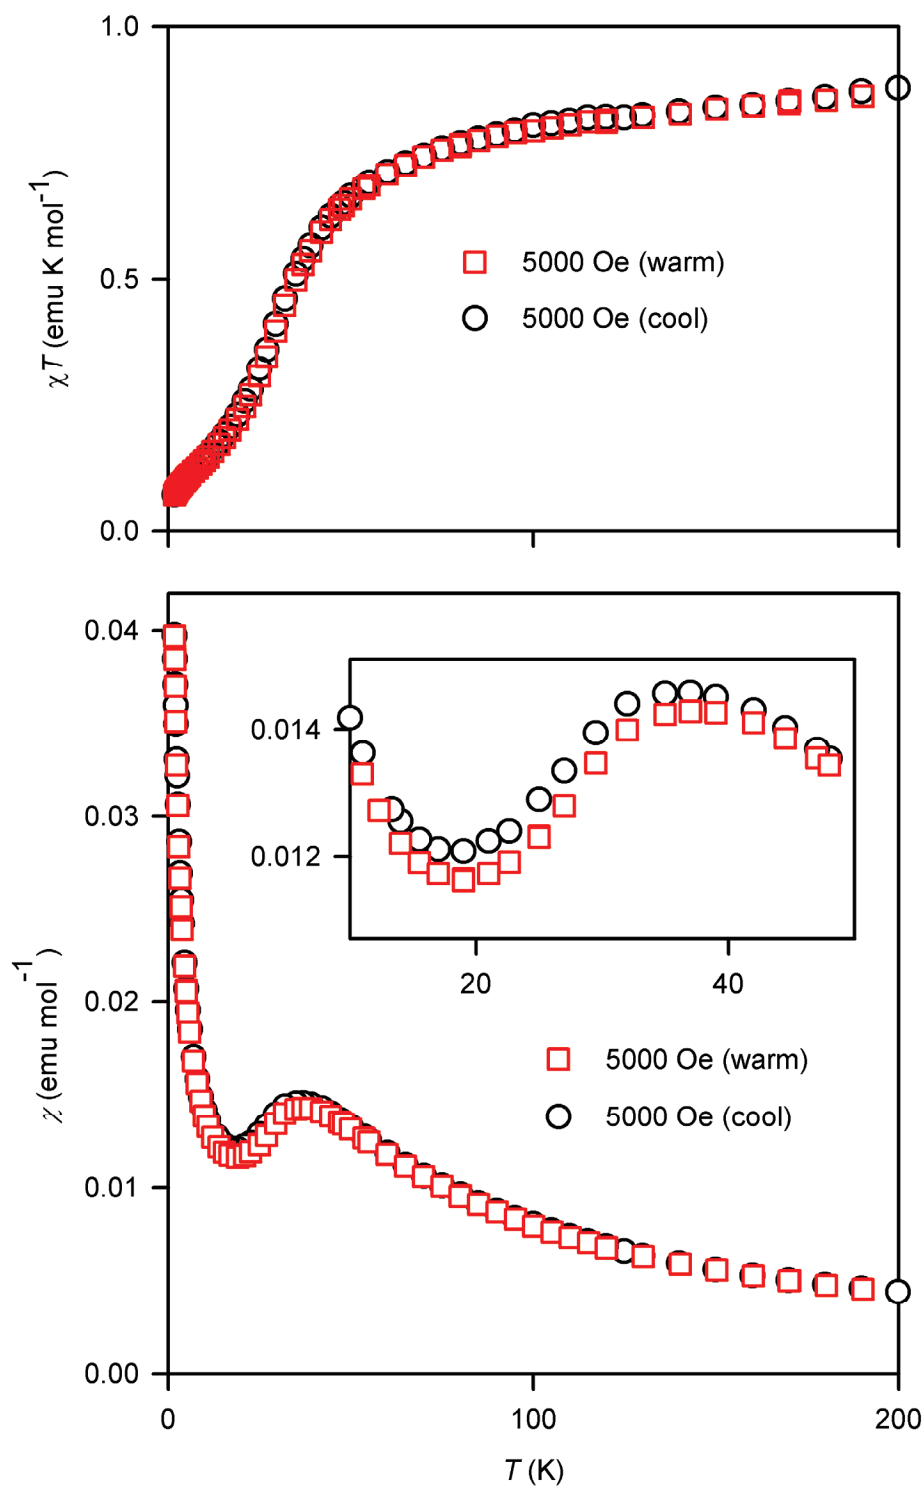

**Figure S8.** SQUID magnetometry for solid nitroxide diradical **2**: plot of  $\chi T$  vs.  $T$ ;  $\chi T_{\text{max}}$  is at 37–39 K (SQUID label: KS754G1). This is the identical sample of **2** (KS0718-1-recryst1) as used for EPR spectra (KS750r1/r2) in Figure S4.

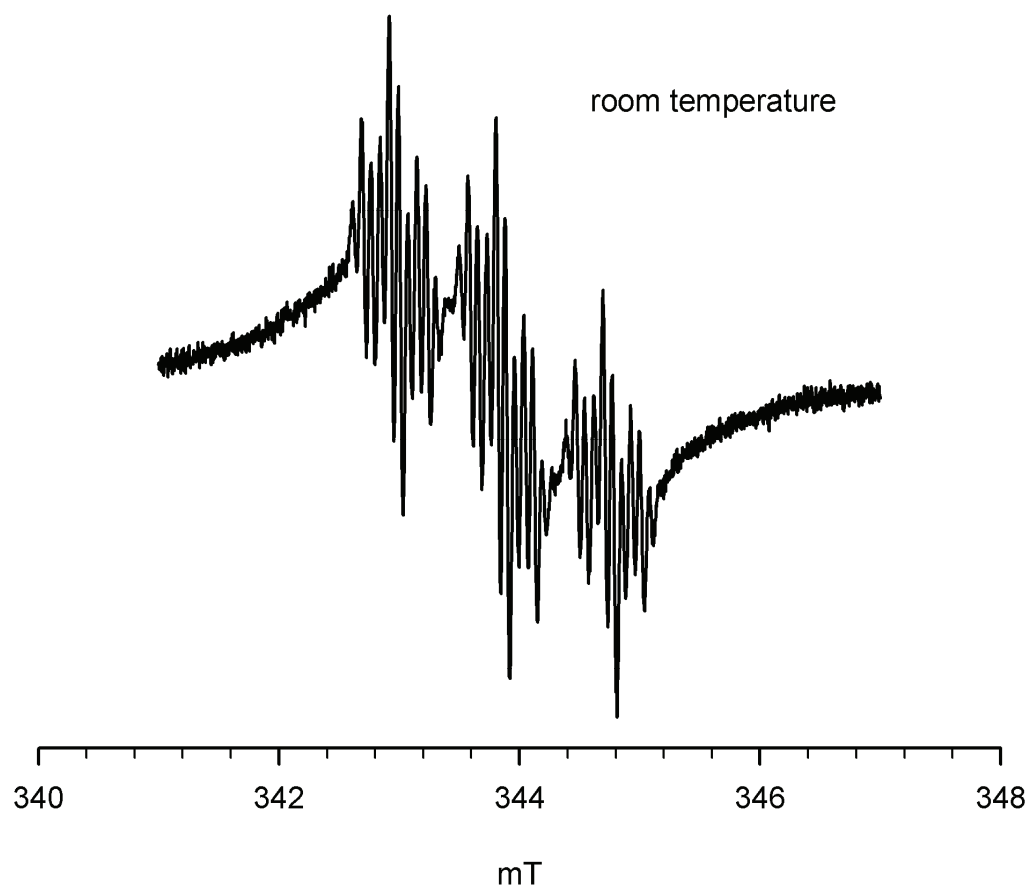

**Figure S9.** EPR (X-Band,  $\nu = 9.6504$  GHz, 2.05 mW, modulation amplitude of 0.2 G) spectrum nitroxide diradical **2** in toluene at 295 K (sample label: KS744-1, EPR label: KS758r5). The spectrum is obtained from the sample obtained in ~33% isolated yield in the 60-mg scale reaction. The sharp peaks correspond to a monoradical by-product.

ks-03-057-3 in CDCl<sub>3</sub>  
LB = 5.0 Hz

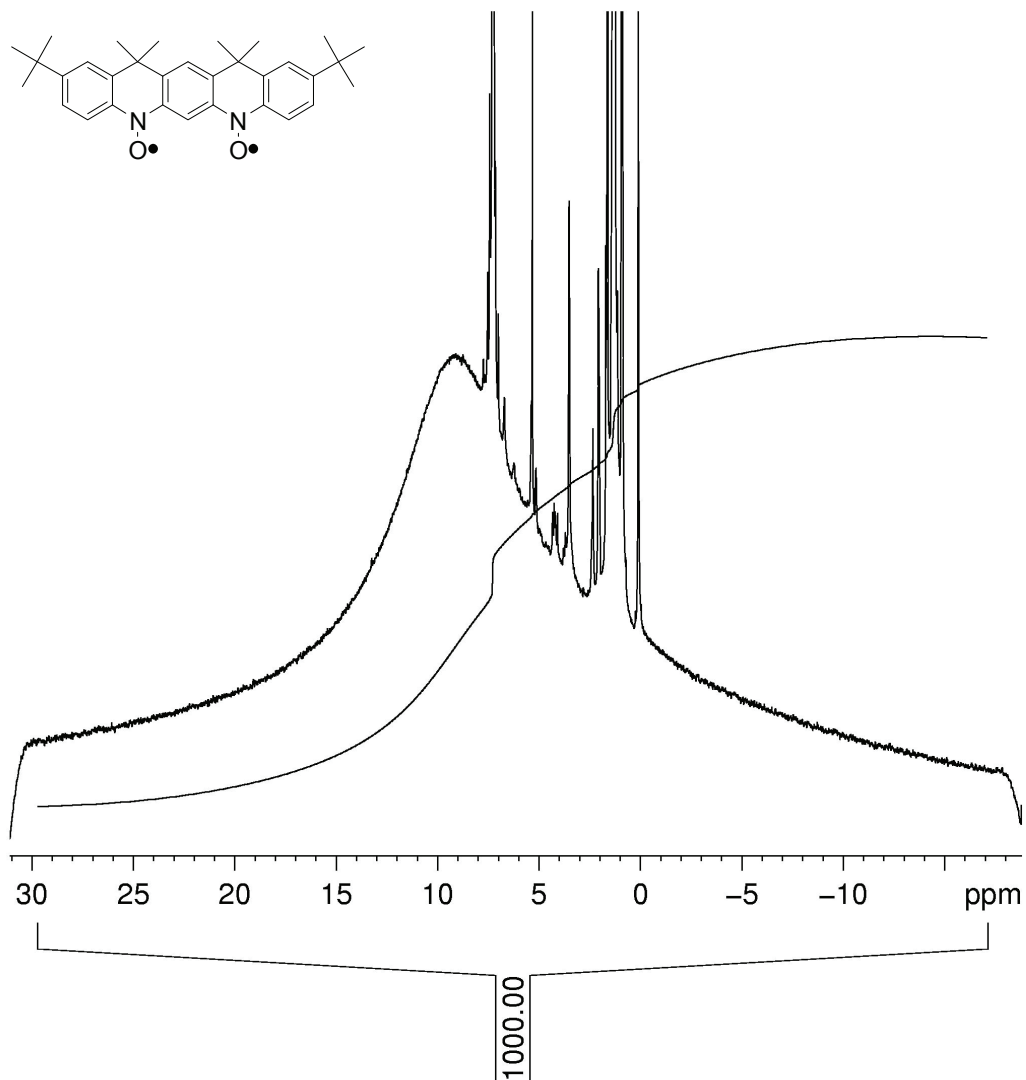

**Figure S10a.** <sup>1</sup>H NMR (400 MHz, CDCl<sub>3</sub>) spectrum of nitroxide diradical **2** (KS357-3).

ks-03-057-3 total Integration set = 1000

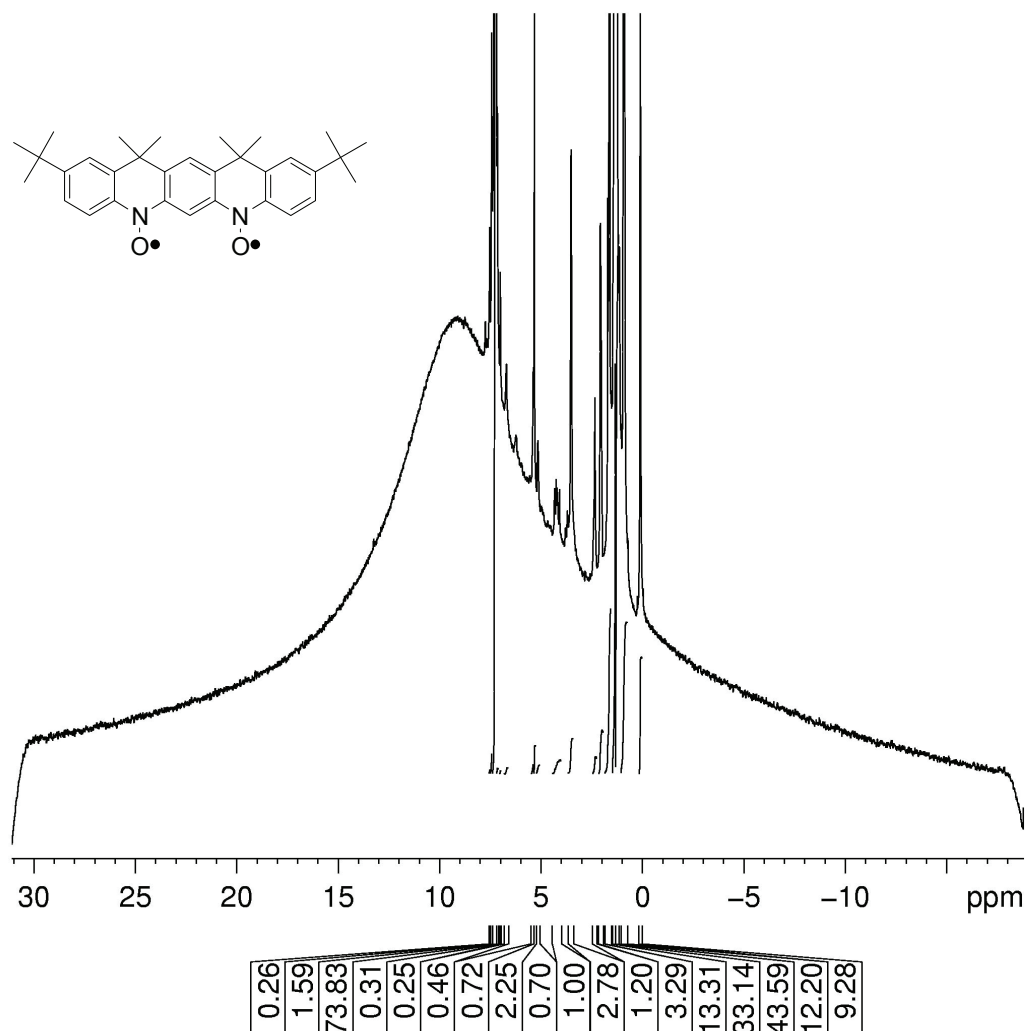

**Figure S10b.** <sup>1</sup>H NMR (400 MHz, CDCl<sub>3</sub>) spectrum of nitroxide diradical **2** (KS357-3).

ks-03-057-3 total Integration set = 1000

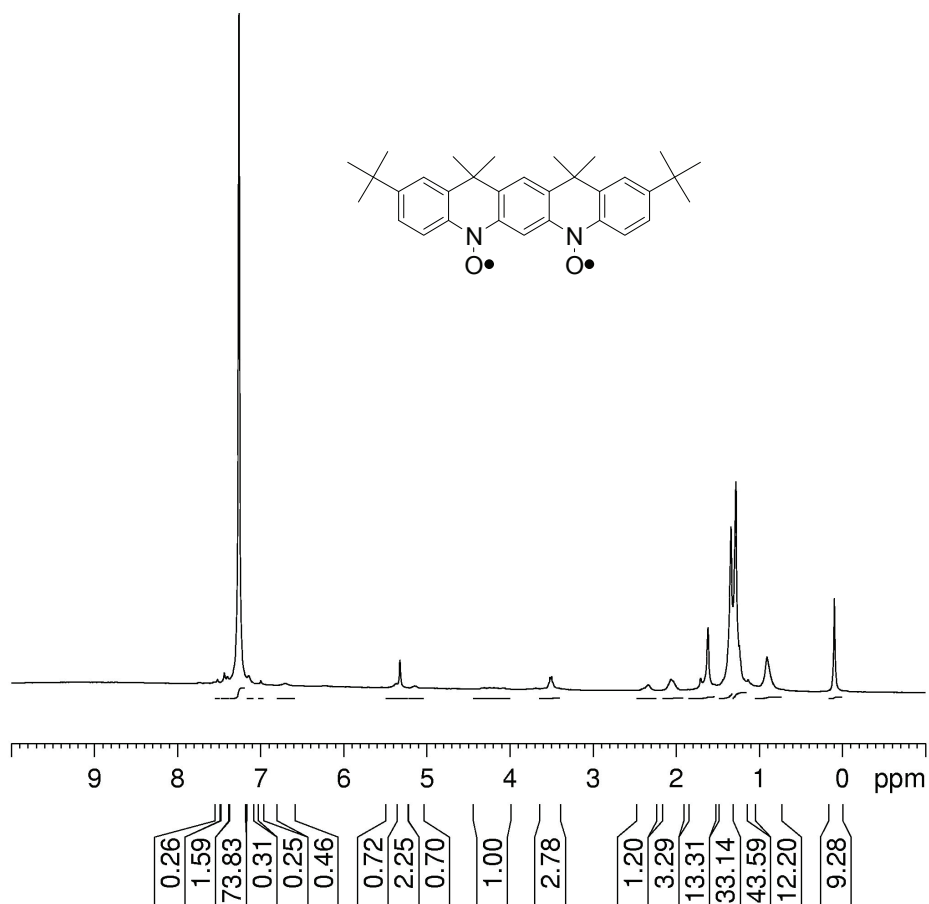

**Figure S10c.** <sup>1</sup>H NMR (400 MHz, CDCl<sub>3</sub>) spectrum of nitroxide diradical **2** (KS357-3); solvent and diamagnetic impurities.

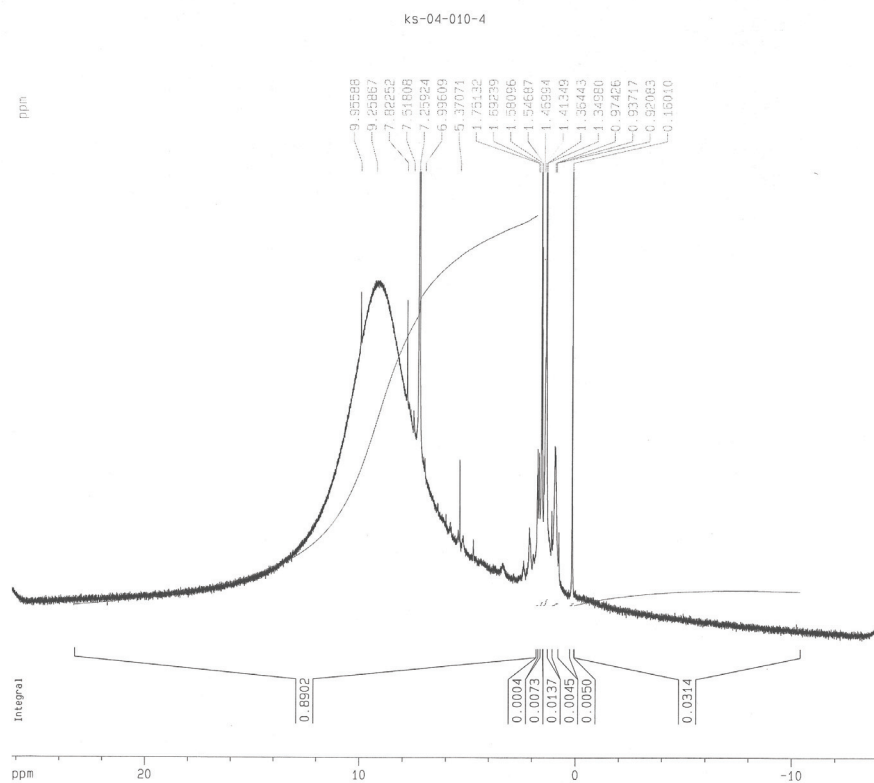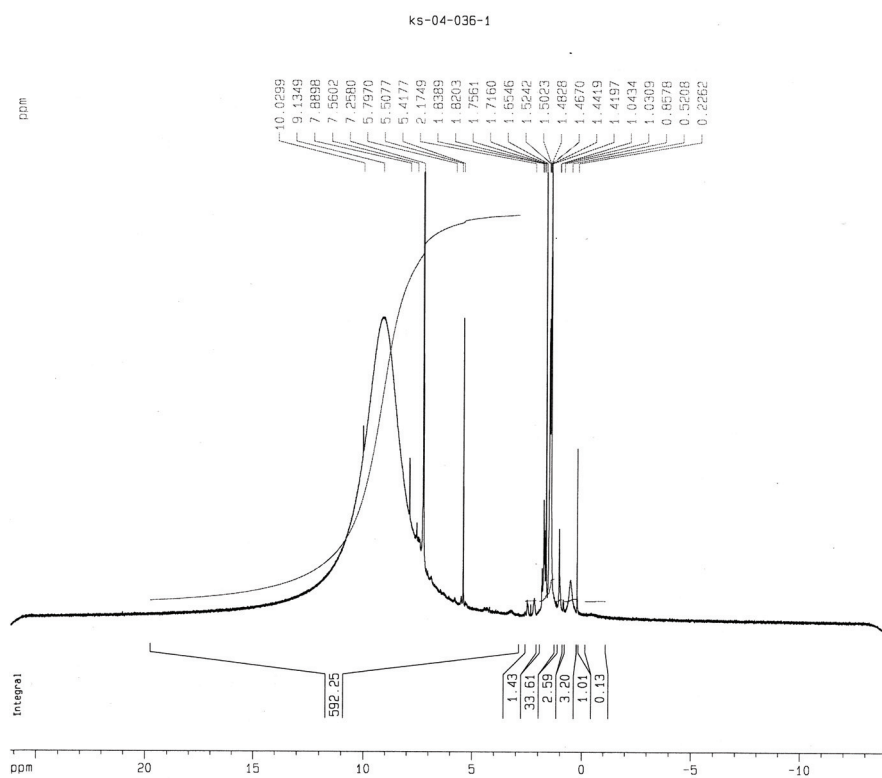

**Figure S11.**  $^1\text{H}$  NMR (400 MHz,  $\text{CDCl}_3$ ) spectra of representative samples of nitroxide diradical **2** (sample labels: KS410-4 and KS436-1, Table S2).



KS450-1r1 in heptane (Notebook; KS1262, 2.69x10<sup>-5</sup>M)

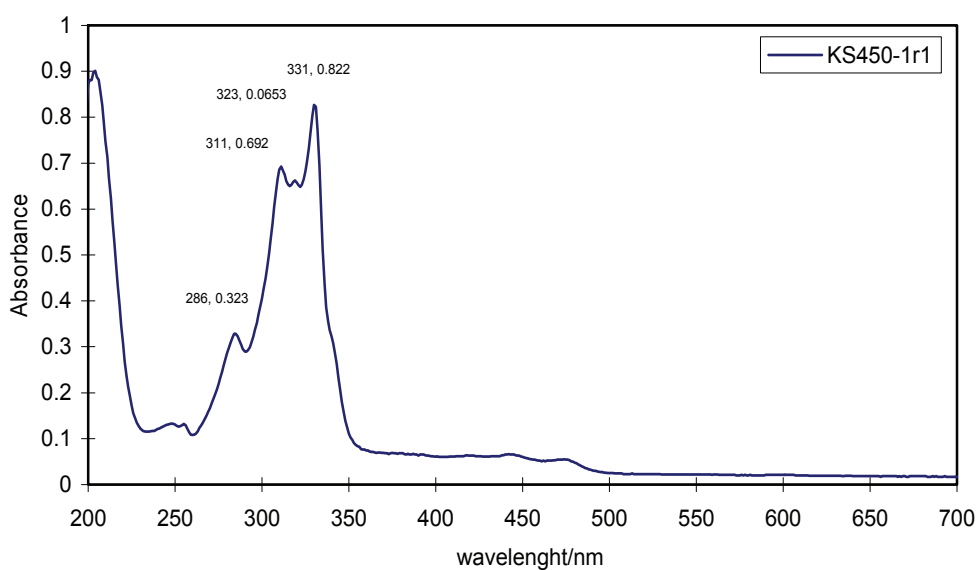

KS450-1r1 in heptane (Notebook; KS1262, 2.69x10<sup>-5</sup>M)

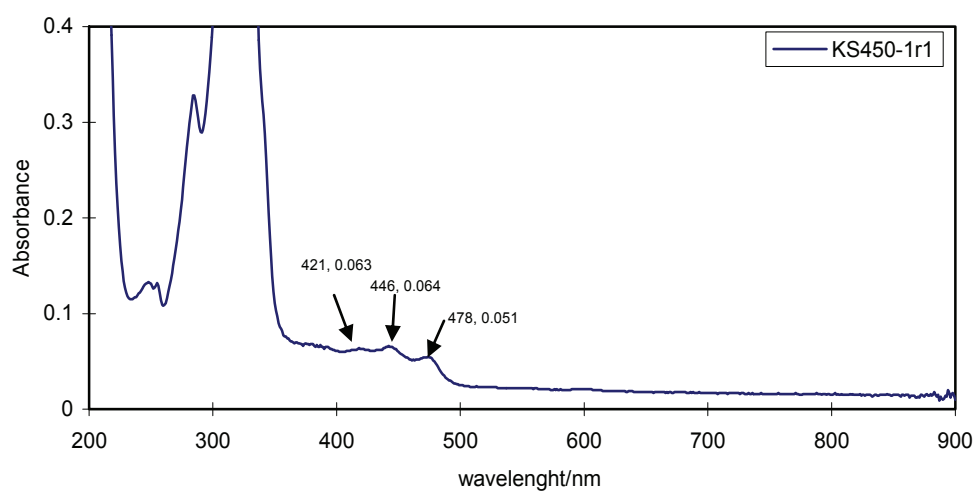

| <i>nm</i> | <i>Abs.</i> | $\epsilon$ |
|-----------|-------------|------------|
| 286       | 0.323       | 5.1E+03    |
| 311       | 0.692       | 1.1E+04    |
| 323       | 0.0653      | 1.0E+04    |
| 331       | 0.822       | 1.3E+04    |
| 421       | 0.063       | 1.0E+03    |
| 446       | 0.064       | 1.0E+03    |
| 478       | 0.051       | 0.8E+03    |

**Figure S12.** UV-vis electronic absorption spectrum of  $2.7 \times 10^{-5}$  M nitroxide diradical **2** (sample label: KS450-1) in heptane (KS1262).

## 9. DFT calculations.

**Table S3.** Summary of UB3LYP/6-31G(d) calculations for diradical **2**, and for the anti- and endo-conformers of the previously reported diarylnitroxide diradical **1**.<sup>S3</sup>

|                                                                                              | <b>2</b>                                                                          | <b>1-anti</b>                                                                      | <b>1-endo</b>                                                                       |
|----------------------------------------------------------------------------------------------|-----------------------------------------------------------------------------------|------------------------------------------------------------------------------------|-------------------------------------------------------------------------------------|
| Optimized geometry for triplets                                                              | 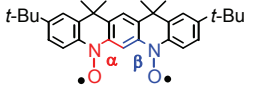 |  |  |
| N...N, O...O distances (Å) for triplets                                                      | 4.8, 4.7                                                                          | 4.9, 6.2                                                                           | 4.8, 4.9                                                                            |
| $\alpha$ , $\beta$ torsion angles (°) for triplets                                           | 0.0, 0.0                                                                          | 25.2, 154.3                                                                        | 26.6, 26.3                                                                          |
| Dipole moment <sup>a</sup> for triplets                                                      | 6.31                                                                              | 2.87                                                                               | 5.51                                                                                |
| Total energy for triplets ( <sup>T</sup> E) <sup>b</sup>                                     | -1502.16836909                                                                    | -1425.92486953                                                                     | -1425.92309079                                                                      |
| Relative energy for triplets <sup>c</sup>                                                    | -                                                                                 | 0                                                                                  | 1.11                                                                                |
| Zero-point-energy (ZPE) for triplets <sup>c</sup>                                            | 397.39467                                                                         | 388.646                                                                            | 388.589                                                                             |
| Lowest vibrational frequencies                                                               | 13.3, 27.8, 30.1                                                                  |                                                                                    |                                                                                     |
| Total energy for BS singlets ( <sup>S</sup> E <sub>BS</sub> ), triplet geom <sup>b,d,e</sup> | -1502.16676111                                                                    | -1425.92343452                                                                     | -1425.92187961                                                                      |
| Total energy for BS singlets ( <sup>S</sup> E <sub>BS</sub> ), optimized <sup>b,d,e</sup>    | -1502.16681855                                                                    |                                                                                    |                                                                                     |
| ZPE for BS singlets <sup>c</sup>                                                             | 397.42476                                                                         |                                                                                    |                                                                                     |
| Lowest vibrational frequencies for BS singlets                                               | 13.3, 26.9, 30.2                                                                  |                                                                                    |                                                                                     |
| $2(^S E_{BS} - ^T E)^{c,e}$ , at the triplet geometries                                      | 2.02                                                                              | 1.8                                                                                | 1.5                                                                                 |
| $2(^S E_{BS} - ^T E)^{c,e}$ , at the optimized geometries, with no ZPE correction            | 1.95                                                                              |                                                                                    |                                                                                     |
| $2(^S E_{BS} - ^T E)^{c,e}$ , at the optimized geometries, after ZPE                         | 2.01                                                                              |                                                                                    |                                                                                     |

<sup>a</sup> Dipole moment in Debye. <sup>b</sup> in Hartree/molecule. <sup>c</sup> in kcal mol<sup>-1</sup>. <sup>d</sup> Broken-symmetry singlet with  $S(S+1) \approx 1.0$  at the geometry optimized for the triplet. <sup>e</sup>The UB3LYP (broken symmetry with  $S(S+1) \approx 1.0$  singlets and  $S(S+1) \approx 2.0$  triplets) level of theory usually overestimates the singlet-triplet gaps,  $2(^S E_{BS} - ^T E)$ , for the triplet ground state organic diradicals, and underestimates such gaps for the singlet ground state diradicals.<sup>S6-S8</sup>

## Nitroxide diradical 2, triplet: geometry optimization and frequency calculation.

Stoichiometry C32H38N2O2(3)  
 Framework group C1[X(C32H38N2O2)]  
 Deg. of freedom 216  
 Full point group C1  
 Largest Abelian subgroup C1 NOp 1  
 Largest concise Abelian subgroup C1 NOp 1  
 Standard orientation:

| Center Number | Atomic Number | Atomic Type | Coordinates (Angstroms) |           |           |
|---------------|---------------|-------------|-------------------------|-----------|-----------|
|               |               |             | X                       | Y         | Z         |
| 1             | 7             | 0           | 2.400715                | 1.864027  | 0.000000  |
| 2             | 7             | 0           | -2.400715               | 1.864027  | 0.000000  |
| 3             | 6             | 0           | 6.224738                | 0.048421  | -0.000003 |
| 4             | 6             | 0           | 5.053388                | -0.723554 | -0.000003 |
| 5             | 1             | 0           | 5.148647                | -1.804895 | -0.000003 |
| 6             | 6             | 0           | 3.764998                | -0.179989 | -0.000002 |
| 7             | 6             | 0           | 2.539198                | -1.100758 | -0.000002 |
| 8             | 6             | 0           | 1.236222                | -0.295983 | -0.000001 |
| 9             | 6             | 0           | 0.000000                | -0.949787 | -0.000001 |
| 10            | 1             | 0           | 0.000000                | -2.034859 | -0.000002 |
| 11            | 6             | 0           | -1.236222               | -0.295983 | 0.000000  |
| 12            | 6             | 0           | -2.539198               | -1.100758 | 0.000000  |
| 13            | 6             | 0           | -3.764998               | -0.179989 | 0.000000  |
| 14            | 6             | 0           | -5.053388               | -0.723554 | 0.000000  |
| 15            | 1             | 0           | -5.148647               | -1.804895 | 0.000000  |
| 16            | 6             | 0           | -6.224738               | 0.048421  | 0.000002  |
| 17            | 6             | 0           | -6.068141               | 1.442777  | 0.000002  |
| 18            | 1             | 0           | -6.933986               | 2.094701  | 0.000003  |
| 19            | 6             | 0           | -4.808222               | 2.025013  | 0.000002  |
| 20            | 1             | 0           | -4.681240               | 3.100063  | 0.000002  |
| 21            | 6             | 0           | -3.661208               | 1.222000  | 0.000001  |
| 22            | 6             | 0           | -1.207025               | 1.113274  | 0.000000  |
| 23            | 6             | 0           | 0.000000                | 1.812727  | 0.000000  |
| 24            | 6             | 0           | 1.207025                | 1.113274  | 0.000000  |
| 25            | 6             | 0           | 3.661208                | 1.222000  | -0.000002 |
| 26            | 6             | 0           | 4.808222                | 2.025013  | -0.000002 |
| 27            | 6             | 0           | 6.068141                | 1.442777  | -0.000002 |
| 28            | 1             | 0           | 6.933986                | 2.094700  | -0.000003 |
| 29            | 6             | 0           | 7.600026                | -0.642790 | 0.000000  |
| 30            | 6             | 0           | 7.734816                | -1.527508 | -1.262411 |
| 31            | 1             | 0           | 6.961540                | -2.302031 | -1.303128 |
| 32            | 1             | 0           | 8.709888                | -2.029667 | -1.273371 |
| 33            | 1             | 0           | 7.652532                | -0.925007 | -2.174140 |
| 34            | 6             | 0           | 8.760832                | 0.370665  | -0.000010 |
| 35            | 1             | 0           | 8.742628                | 1.012822  | 0.887842  |
| 36            | 1             | 0           | 8.742618                | 1.012815  | -0.887867 |
| 37            | 1             | 0           | 9.717003                | -0.164591 | -0.000007 |
| 38            | 6             | 0           | 7.734817                | -1.527483 | 1.262430  |
| 39            | 1             | 0           | 6.961547                | -2.302012 | 1.303158  |
| 40            | 1             | 0           | 7.652524                | -0.924967 | 2.174148  |
| 41            | 1             | 0           | 8.709893                | -2.029634 | 1.273405  |
| 42            | 6             | 0           | 2.580127                | -1.996583 | -1.268440 |
| 43            | 1             | 0           | 2.551990                | -1.385335 | -2.176048 |
| 44            | 1             | 0           | 1.726682                | -2.681962 | -1.292469 |

|    |   |   |           |           |           |
|----|---|---|-----------|-----------|-----------|
| 45 | 1 | 0 | 3.492461  | -2.600959 | -1.292917 |
| 46 | 6 | 0 | 2.580126  | -1.996579 | 1.268440  |
| 47 | 1 | 0 | 2.551985  | -1.385328 | 2.176045  |
| 48 | 1 | 0 | 3.492460  | -2.600953 | 1.292919  |
| 49 | 1 | 0 | 1.726681  | -2.681958 | 1.292468  |
| 50 | 6 | 0 | -2.580127 | -1.996580 | -1.268440 |
| 51 | 1 | 0 | -2.551988 | -1.385331 | -2.176047 |
| 52 | 1 | 0 | -3.492462 | -2.600954 | -1.292918 |
| 53 | 1 | 0 | -1.726683 | -2.681960 | -1.292469 |
| 54 | 6 | 0 | -2.580126 | -1.996581 | 1.268440  |
| 55 | 1 | 0 | -2.551986 | -1.385332 | 2.176046  |
| 56 | 1 | 0 | -1.726680 | -2.681960 | 1.292468  |
| 57 | 1 | 0 | -3.492459 | -2.600957 | 1.292918  |
| 58 | 6 | 0 | -7.600026 | -0.642790 | 0.000002  |
| 59 | 6 | 0 | -7.734820 | -1.527490 | -1.262422 |
| 60 | 1 | 0 | -6.961548 | -2.302016 | -1.303150 |
| 61 | 1 | 0 | -7.652531 | -0.924976 | -2.174144 |
| 62 | 1 | 0 | -8.709895 | -2.029643 | -1.273392 |
| 63 | 6 | 0 | -7.734814 | -1.527502 | 1.262418  |
| 64 | 1 | 0 | -7.652525 | -0.924997 | 2.174144  |
| 65 | 1 | 0 | -6.961539 | -2.302026 | 1.303136  |
| 66 | 1 | 0 | -8.709887 | -2.029659 | 1.273384  |
| 67 | 6 | 0 | -8.760832 | 0.370665  | 0.000003  |
| 68 | 1 | 0 | -9.717003 | -0.164591 | 0.000003  |
| 69 | 1 | 0 | -8.742624 | 1.012817  | -0.887853 |
| 70 | 1 | 0 | -8.742621 | 1.012819  | 0.887856  |
| 71 | 1 | 0 | 0.000000  | 2.892454  | 0.000000  |
| 72 | 1 | 0 | 4.681240  | 3.100063  | -0.000001 |
| 73 | 8 | 0 | 2.344869  | 3.143443  | 0.000000  |
| 74 | 8 | 0 | -2.344869 | 3.143443  | 0.000001  |

-----  
Rotational constants (GHZ): 0.3571653 0.0408679 0.0378921  
Standard basis: 6-31G(d) (6D, 7F)

SCF Done: E(UB+HF-LYP) = -1502.16836909 A.U. after 22 cycles  
Conv = 0.2662D-08 -V/T = 2.0096  
S\*\*2 = 2.0375

Annihilation of the first spin contaminant:

S\*\*2 before annihilation 2.0375, after 2.0009

| Item                 | Value    | Threshold | Converged? |
|----------------------|----------|-----------|------------|
| Maximum Force        | 0.000001 | 0.000015  | YES        |
| RMS Force            | 0.000000 | 0.000010  | YES        |
| Maximum Displacement | 0.000039 | 0.000060  | YES        |
| RMS Displacement     | 0.000008 | 0.000040  | YES        |

Predicted change in Energy = -2.169509D-11

Optimization completed.

-- Stationary point found.

**After frequency calculation:**

| Item                 | Value    | Threshold | Converged? |
|----------------------|----------|-----------|------------|
| Maximum Force        | 0.000000 | 0.000015  | YES        |
| RMS Force            | 0.000000 | 0.000010  | YES        |
| Maximum Displacement | 0.000029 | 0.000060  | YES        |
| RMS Displacement     | 0.000006 | 0.000040  | YES        |

Predicted change in Energy=-5.565784D-12

Optimization completed.

-- Stationary point found.

## Nitroxide diradical 2, BS singlet: geometry optimization and frequency calculation.

Stoichiometry C32H38N2O2  
Framework group C1[X(C32H38N2O2)]  
Deg. of freedom 216  
Full point group C1  
Largest Abelian subgroup C1 NOp 1  
Largest concise Abelian subgroup C1 NOp 1  
Standard orientation:

| Center Number | Atomic Number | Atomic Type | Coordinates (Angstroms) |           |           |
|---------------|---------------|-------------|-------------------------|-----------|-----------|
|               |               |             | X                       | Y         | Z         |
| 1             | 7             | 0           | -2.404684               | 1.864709  | 0.000000  |
| 2             | 7             | 0           | 2.404684                | 1.864709  | 0.000000  |
| 3             | 6             | 0           | -6.225610               | 0.046541  | 0.000000  |
| 4             | 6             | 0           | -5.053211               | -0.723862 | -0.000001 |
| 5             | 1             | 0           | -5.147164               | -1.805361 | -0.000001 |
| 6             | 6             | 0           | -3.765626               | -0.178632 | -0.000001 |
| 7             | 6             | 0           | -2.538492               | -1.097310 | -0.000001 |
| 8             | 6             | 0           | -1.235586               | -0.292254 | -0.000001 |
| 9             | 6             | 0           | 0.000000                | -0.947295 | 0.000000  |
| 10            | 1             | 0           | 0.000000                | -2.032238 | 0.000000  |
| 11            | 6             | 0           | 1.235586                | -0.292254 | 0.000000  |
| 12            | 6             | 0           | 2.538492                | -1.097310 | 0.000000  |
| 13            | 6             | 0           | 3.765626                | -0.178632 | 0.000000  |
| 14            | 6             | 0           | 5.053211                | -0.723862 | 0.000001  |
| 15            | 1             | 0           | 5.147164                | -1.805361 | 0.000001  |
| 16            | 6             | 0           | 6.225610                | 0.046541  | 0.000001  |
| 17            | 6             | 0           | 6.070485                | 1.441243  | 0.000000  |
| 18            | 1             | 0           | 6.937204                | 2.092043  | 0.000000  |
| 19            | 6             | 0           | 4.811622                | 2.025343  | 0.000000  |
| 20            | 1             | 0           | 4.686497                | 3.100637  | 0.000000  |
| 21            | 6             | 0           | 3.662921                | 1.223828  | 0.000000  |
| 22            | 6             | 0           | 1.205297                | 1.114174  | 0.000000  |
| 23            | 6             | 0           | 0.000000                | 1.814007  | 0.000000  |
| 24            | 6             | 0           | -1.205297               | 1.114174  | 0.000000  |
| 25            | 6             | 0           | -3.662921               | 1.223828  | 0.000000  |
| 26            | 6             | 0           | -4.811622               | 2.025343  | 0.000000  |
| 27            | 6             | 0           | -6.070485               | 1.441243  | 0.000000  |
| 28            | 1             | 0           | -6.937204               | 2.092043  | 0.000000  |
| 29            | 6             | 0           | -7.600057               | -0.646314 | 0.000001  |
| 30            | 6             | 0           | -7.733978               | -1.531215 | 1.262384  |
| 31            | 1             | 0           | -6.959742               | -2.304789 | 1.303128  |
| 32            | 1             | 0           | -8.708430               | -2.034605 | 1.273331  |
| 33            | 1             | 0           | -7.652436               | -0.928616 | 2.174116  |
| 34            | 6             | 0           | -8.762023               | 0.365818  | 0.000000  |
| 35            | 1             | 0           | -8.744494               | 1.008004  | -0.887847 |
| 36            | 1             | 0           | -8.744493               | 1.008006  | 0.887846  |
| 37            | 1             | 0           | -9.717620               | -0.170474 | 0.000002  |
| 38            | 6             | 0           | -7.733980               | -1.531217 | -1.262381 |
| 39            | 1             | 0           | -6.959744               | -2.304791 | -1.303126 |
| 40            | 1             | 0           | -7.652440               | -0.928620 | -2.174114 |
| 41            | 1             | 0           | -8.708431               | -2.034607 | -1.273326 |
| 42            | 6             | 0           | -2.577785               | -1.993092 | 1.268622  |
| 43            | 1             | 0           | -2.549496               | -1.381710 | 2.176121  |
| 44            | 1             | 0           | -1.724374               | -2.678495 | 1.292364  |

|    |   |   |           |           |           |
|----|---|---|-----------|-----------|-----------|
| 45 | 1 | 0 | -3.490109 | -2.597343 | 1.293390  |
| 46 | 6 | 0 | -2.577784 | -1.993091 | -1.268625 |
| 47 | 1 | 0 | -2.549495 | -1.381708 | -2.176123 |
| 48 | 1 | 0 | -3.490109 | -2.597342 | -1.293393 |
| 49 | 1 | 0 | -1.724373 | -2.678494 | -1.292367 |
| 50 | 6 | 0 | 2.577784  | -1.993092 | 1.268624  |
| 51 | 1 | 0 | 2.549495  | -1.381709 | 2.176122  |
| 52 | 1 | 0 | 3.490108  | -2.597342 | 1.293392  |
| 53 | 1 | 0 | 1.724373  | -2.678494 | 1.292366  |
| 54 | 6 | 0 | 2.577785  | -1.993092 | -1.268623 |
| 55 | 1 | 0 | 2.549496  | -1.381709 | -2.176122 |
| 56 | 1 | 0 | 1.724374  | -2.678495 | -1.292365 |
| 57 | 1 | 0 | 3.490109  | -2.597343 | -1.293391 |
| 58 | 6 | 0 | 7.600057  | -0.646314 | 0.000000  |
| 59 | 6 | 0 | 7.733979  | -1.531217 | 1.262382  |
| 60 | 1 | 0 | 6.959743  | -2.304791 | 1.303127  |
| 61 | 1 | 0 | 7.652439  | -0.928620 | 2.174115  |
| 62 | 1 | 0 | 8.708431  | -2.034607 | 1.273327  |
| 63 | 6 | 0 | 7.733979  | -1.531215 | -1.262383 |
| 64 | 1 | 0 | 7.652437  | -0.928616 | -2.174115 |
| 65 | 1 | 0 | 6.959742  | -2.304789 | -1.303128 |
| 66 | 1 | 0 | 8.708430  | -2.034605 | -1.273330 |
| 67 | 6 | 0 | 8.762023  | 0.365818  | 0.000001  |
| 68 | 1 | 0 | 9.717620  | -0.170474 | 0.000000  |
| 69 | 1 | 0 | 8.744494  | 1.008004  | 0.887848  |
| 70 | 1 | 0 | 8.744493  | 1.008006  | -0.887845 |
| 71 | 1 | 0 | 0.000000  | 2.893618  | 0.000000  |
| 72 | 1 | 0 | -4.686497 | 3.100637  | 0.000001  |
| 73 | 8 | 0 | -2.344126 | 3.144340  | 0.000000  |
| 74 | 8 | 0 | 2.344126  | 3.144340  | 0.000000  |

-----  
Rotational constants (GHZ): 0.3571836 0.0408627 0.0378880

Standard basis: 6-31G(d) (6D, 7F)

SCF Done: E(UB+HF-LYP) = -1502.16681863 a.u. after 2 cycles  
 Conv g = 0.1986D-05 18 Fock formations.  
 S\*\*2 = 1.0127 -V/T = 2.0096

Annihilation of the first spin contaminant:

S\*\*2 before annihilation 1.0127, after 0.1575

| Item                 | Value    | Threshold | Converged? |
|----------------------|----------|-----------|------------|
| Maximum Force        | 0.000000 | 0.000015  | YES        |
| RMS Force            | 0.000000 | 0.000010  | YES        |
| Maximum Displacement | 0.000005 | 0.000060  | YES        |
| RMS Displacement     | 0.000001 | 0.000040  | YES        |

Predicted change in Energy=-3.141572D-13

Optimization completed.

-- Stationary point found.

**After frequency calculation:**

| Item                 | Value    | Threshold | Converged? |
|----------------------|----------|-----------|------------|
| Maximum Force        | 0.000000 | 0.000015  | YES        |
| RMS Force            | 0.000000 | 0.000010  | YES        |
| Maximum Displacement | 0.000005 | 0.000060  | YES        |
| RMS Displacement     | 0.000001 | 0.000040  | YES        |

Predicted change in Energy=-3.289080D-13

Optimization completed.

-- Stationary point found.

## 10. Supporting references.

- S1. W. Adam, J. Bialas and L. Hadjiarapoglou, *Chem. Ber.*, 1991, **124**, 2377.
- S2. M. Gilbert, M. Ferrer, F. Sanchez-Baeza and A. Messeguer, *Tetrahedron*, 1997, **53**, 8643–8650.
- S3. A. Rajca, M. Vale and S. Rajca, *J. Am. Chem. Soc.*, 2008, **130**, 9099–9105.
- S4. A. Rajca, M. Takahashi, M. Pink, G. Spagnol and S. Rajca, *J. Am. Chem. Soc.*, 2007, **129**, 10159–10170.
- S5. A. Rajca, S. Mukherjee, M. Pink and S. Rajca, *J. Am. Chem. Soc.*, 2006, **128**, 13497–13507.
- S6. D. Y. Zhang, D. A. Hrovat, M. Abe and W. T. Borden, *J. Am. Chem. Soc.*, 2003, **125**, 12823–12828.
- S7. C. J. Cramer and B. A. Smith, *J. Phys. Chem.*, 1996, **100**, 9664–9670.
- S8. A. H. Winter, D. E. Falvey, C. J. Cramer and B. F. Gherman, *J. Am. Chem. Soc.*, 2007, **129**, 10113–10119
